# Supplementary material for: The Impact of Political Climate on Student Health and Wellbeing: A Qualitative Study
Source: Research Square preprint supplement (doi:10.21203/rs.3.rs-8524310/v1), 2026-01-22
Supplement: Supplementary file 1 [file ceb91f2d9220c3b6eca49403.docx]

**Supplemental Table 1.** Responses to Freelist Interview Questions by Nationality, Age, Gender, Race, and Academic Level (Question 1)

| **Nationality** | | | | **Sex** | | | | **Race** | | | | **Academic Level** | | | | | | |
| --- | --- | --- | --- | --- | --- | --- | --- | --- | --- | --- | --- | --- | --- | --- | --- | --- | --- | --- |
| **US** | | **International** | | **Male** | | **Female** | | **White** | | **Non-White** | | **Graduate** | | | **Undergraduate** | | | |
| **Response** | **SSI** | **Response** | **SSI** | **Response** | **SSI** | **Response** | **SSI** | **Response** | **SSI** | **Response** | **SSI** | **Response** | **SSI** | | **Response** | | **SSI** | |
| **Question 1: In this political climate, please list all the attitudes and feelings that come to mind when you think about the last four months.** | | | | | | | | | | | | | | | | | | |
| Uncertainty/Chaotic/Instability | 0.15 | Anxious/Concerned/Bad | 0.31 | Uncertainty/Chaotic/Instability | 0.16 | Uncertainty/Chaotic/Instability | 0.13 | Uncertainty/Chaotic/Instability | 0.25 | Anxious/Concerned/Bad | 0.15 | Uncertainty/Chaotic/Instability | | 0.16 | | Anxious/Concerned/Bad | 0.14 |
| Anger/Aggression/Adversarial | 0.10 | Afraid/Doom/Dread | 0.11 | Anxious/Concerned/Bad | 0.14 | Anxious/Concerned/Bad | 0.13 | Anxious/Concerned/Bad | 0.10 | Uncertainty/Chaotic/Instability | 0.10 | Anxious/Concerned/Bad | | 0.13 | | Uncertainty/Chaotic/Instability | 0.12 |
| Anxious/Concerned/Bad | 0.09 | Uncertainty/Chaotic/Instability | 0.10 | Stress/Tough/Tense | 0.09 | Afraid/Doom/Dread | 0.09 | Anger/Aggression/Adversarial | 0.10 | Anger/Aggression/Adversarial | 0.08 | Annoyed/Frustration/Indignant | | 0.09 | | Anger/Aggression/Adversarial | 0.09 |
| Annoyed/Frustration/Indignant | 0.09 | Unsure/Conflicted/Discomfort | 0.06 | Anger/Aggression/Adversarial | 0.08 | Anger/Aggression/Adversarial | 0.09 | Stress/Tough/Tense | 0.09 | Afraid/Doom/Dread | 0.08 | Stress/Tough/Tense | | 0.09 | | Unsure/Conflicted/Discomfort | 0.07 |
| Stress/Tough/Tense | 0.08 | Sleepy/Tired/Exhausting | 0.06 | Sociopolitical decline/ Deportation/Misinformation | 0.06 | Annoyed/Frustration/Indignant | 0.08 | Afraid/Doom/Dread | 0.07 | Disempowered/Hopeless/Unfair | 0.07 | Anger/Aggression/Adversarial | | 0.09 | | Afraid/Doom/Dread | 0.07 |

**Supplemental Table 1 (Continued).** Responses to Freelist Interview Questions by Nationality, Age, Gender, Race, and Academic Level (Question 2)

| **Nationality** | | | | **Sex** | | | | **Race** | | | | **Academic Level** | | | | | | |
| --- | --- | --- | --- | --- | --- | --- | --- | --- | --- | --- | --- | --- | --- | --- | --- | --- | --- | --- |
| **US** | | **International** | | **Male** | | **Female** | | **White** | | **Non-White** | | **Graduate** | | | **Undergraduate** | | | |
| **Response** | **SSI** | **Response** | **SSI** | **Response** | **SSI** | **Response** | **SSI** | **Response** | **SSI** | **Response** | **SSI** | **Response** | **SSI** | | **Response** | | **SSI** | |
| **Question 2: Please list all the things that you are doing to take care of yourself and stay physically healthy over the last four months.** | | | | | | | | | | | | | | | | | | |
| Physical exercise | 0.55 | Physical exercise | 0.57 | Physical exercise | 0.58 | Physical exercise | 0.54 | Physical exercise | 0.55 | Physical exercise | 0.55 | Physical exercise | | 0.53 | | Physical exercise | | 0.58 | |
| Diet management | 0.21 | Drinking enough water | 0.1 | Diet management | 0.20 | Diet management | 0.18 | Diet management | 0.22 | Diet management | 0.17 | Diet management | | 0.17 | | Diet management | | 0.21 | |
| Sleep and rest | 0.04 | Diet management | 0.10 | Personal hygiene/Self care | 0.04 | Sleep and rest | 0.05 | Personal hygiene/Self care | 0.06 | Sleep and rest | 0.05 | Drinking enough water | | 0.06 | | Time outside | | 0.04 | |
| Personal hygiene/Self care | 0.03 | Nothing | 0.07 | Drinking enough water | 0.04 | Drinking enough water | 0.04 | Drinking enough water | 0.04 | Drinking enough water | 0.04 | Sleep and rest | | 0.04 | | Sleep and rest | | 0.04 | |
| Friends and family | 0.03 | Sleep and rest | 0.06 | Time outside | 0.03 | Friends and family | 0.03 | Medications/Vitamins | 0.03 | Friends and family | 0.03 | Therapy/Doctor's appointments | | 0.03 | | Personal hygiene/Self care | | 0.03 | |

**Supplemental Table 1 (Continued).** Responses to Freelist Interview Questions by Nationality, Age, Gender, Race, and Academic Level (Question 3)

| **Nationality** | | | | **Sex** | | | | **Race** | | | | **Academic Level** | | | | | | |
| --- | --- | --- | --- | --- | --- | --- | --- | --- | --- | --- | --- | --- | --- | --- | --- | --- | --- | --- |
| **US** | | **International** | | **Male** | | **Female** | | **White** | | **Non-White** | | **Graduate** | | | **Undergraduate** | | | |
| **Response** | **SSI** | **Response** | **SSI** | **Response** | **SSI** | **Response** | **SSI** | **Response** | **SSI** | **Response** | **SSI** | **Response** | **SSI** | | **Response** | | **SSI** | |
| **Question 3: Please list all the things that you are doing to take care of yourself and stay mentally healthy over the last four months.** | | | | | | | | | | | | | | | | | | |
| Time with support systems | 0.18 | Talking with support systems | 0.19 | Talking with support systems | 0.21 | Time with support systems | 0.16 | Time with support systems | 0.19 | Talking with support systems | 0.20 | Time with support systems | | 0.17 | | Talking with support systems | | 0.20 | |
| Talking with support systems | 0.15 | Time with support systems | 0.11 | Time with support systems | 0.18 | Talking with support systems | 0.13 | Therapy/Medications | 0.13 | Time with support systems | 0.15 | Talking with support systems | | 0.13 | | Time with support systems | | 0.16 | |
| Therapy/Medications | 0.09 | Physical Activity | 0.09 | Creating work/life/school boundaries | 0.08 | Therapy/Medications | 0.11 | Creating work/life/school boundaries | 0.10 | Therapy/Medications | 0.06 | Therapy/Medications | | 0.09 | | Mindfulness Practices | | 0.07 | |
| Creating work/life/school boundaries | 0.07 | Mindfulness Practices | 0.08 | Creating information boundaries | 0.07 | Mindfulness Practices | 0.07 | Physical Activity | 0.10 | Creating work/life/school boundaries | 0.06 | Creating work/life/school boundaries | | 0.07 | | Creating information boundaries | | 0.07 | |
| Sleep/Rest | 0.07 | Media Distraction | 0.08 | Physical Activity | 0.07 | Same as physical | 0.07 | Sleep/Rest | 0.06 | Media Distraction | 0.06 | Physical Activity | | 0.07 | | Creating work/life/school boundaries | | 0.07 | |

**Supplemental Table 1 (Continued).** Responses to Freelist Interview Questions by Nationality, Age, Gender, Race, and Academic Level (Question 4)

| **Nationality** | | | | **Sex** | | | | **Race** | | | | **Academic Level** | | | | | | |
| --- | --- | --- | --- | --- | --- | --- | --- | --- | --- | --- | --- | --- | --- | --- | --- | --- | --- | --- |
| **US** | | **International** | | **Male** | | **Female** | | **White** | | **Non-White** | | **Graduate** | | | **Undergraduate** | | | |
| **Response** | **SSI** | **Response** | **SSI** | **Response** | **SSI** | **Response** | **SSI** | **Response** | **SSI** | **Response** | **SSI** | **Response** | **SSI** | | **Response** | | **SSI** | |
| **Question 4: Please list all the things that have made it difficult for you to be healthy in the last four months.** | | | | | | | | | | | | | | | | | | |
| Workload and pressure | 0.23 | Workload and pressure | 0.23 | Workload and pressure | 0.23 | Workload and pressure | 0.23 | Workload and pressure | 0.20 | Workload and pressure | 0.25 | Workload and pressure | | 0.28 | | Workload and pressure | 0.16 |
| Financial strain/Economic fears | 0.13 | Mental health/Anxiety/Stress | 0.17 | Limited time/wasting time | 0.10 | Financial strain/Economic fears | 0.16 | Mental Health/Anxiety/Stress | 0.17 | Financial strain/Economic fears | 0.11 | Mental Health/Anxiety/Stress | | 0.12 | | Mental Health/Anxiety/Stress | 0.13 |
| Mental Health/Anxiety/Stress | 0.11 | News overload | 0.11 | Mental Health/Anxiety/Stress | 0.10 | Mental Health/Anxiety/Stress | 0.14 | Financial strain/Economic fears | 0.12 | Mental Health/Anxiety/Stress | 0.11 | Financial strain/Economic fears | | 0.11 | | Financial strain/Economic fears | 0.12 |
| News overload | 0.08 | Exhaustion/Sacrificing sleep | 0.09 | Exhaustion/Sacrificing sleep | 0.09 | News overload | 0.11 | Political climate's impact | 0.11 | News overload | 0.11 | Political climate's impact | | 0.08 | | News overload | 0.12 |
| Political climate's impact | 0.08 | Men | 0.07 | Schedule inflexibility | 0.08 | Political climate's impact | 0.09 | Social expectations | 0.06 | Limited time/wasting time | 0.06 | News overload | | 0.06 | | Limited time/wasting time | 0.07 |

**Supplemental Table 1 (Continued).** Responses to Freelist Interview Questions by Nationality, Age, Gender, Race, and Academic Level (Question 5)

| **Nationality** | | | | **Sex** | | | | **Race** | | | | **Academic Level** | | | | | | |
| --- | --- | --- | --- | --- | --- | --- | --- | --- | --- | --- | --- | --- | --- | --- | --- | --- | --- | --- |
| **US** | | **International** | | **Male** | | **Female** | | **White** | | **Non-White** | | **Graduate** | | | **Undergraduate** | | | |
| **Response** | **SSI** | **Response** | **SSI** | **Response** | **SSI** | **Response** | **SSI** | **Response** | **SSI** | **Response** | **SSI** | **Response** | **SSI** | | **Response** | | **SSI** | |
| **Question 5: Please list all the things that have made it easy for you to be healthy in the last four months.** | | | | | | | | | | | | | | | | | | |
| Strong support systems | 0.31 | Strong support systems | 0.50 | Strong support systems | 0.23 | Strong support systems | 0.41 | Strong support systems | 0.25 | Strong support systems | 0.39 | Strong support systems | | 0.35 | | Strong support systems | | 0.35 | |
| Flexible schedule/Free time | 0.14 | Nothing | 0.14 | Access to nutrition/wellness | 0.18 | Flexible schedule/Free time | 0.12 | Access to nutrition/wellness | 0.16 | Access to nutrition/wellness | 0.11 | Flexible schedule/Free time | | 0.11 | | Access to nutrition/wellness | | 0.15 | |
| Access to nutrition/wellness | 0.14 | Access to nutrition/wellness | 0.07 | Proximity to essential needs | 0.09 | Access to nutrition/wellness | 0.09 | Flexible schedule/Free time | 0.15 | Flexible schedule/Free time | 0.09 | Access to nutrition/wellness | | 0.10 | | Flexible schedule/Free time | | 0.11 | |
| Structure/boundaries/intentionality | 0.08 | Material Security/Insurance | 0.05 | Flexible schedule/Free time | 0.08 | Structure/boundaries/intentionality | 0.08 | Structure/boundaries/intentionality | 0.07 | Structure/boundaries/intentionality | 0.06 | Structure/boundaries/intentionality | | 0.07 | | Proximity to essential needs | | 0.09 | |
| Proximity to essential needs | 0.05 | Good weather/outdoors | 0.05 | Material Security/Insurance | 0.06 | Nothing | 0.05 | Good weather/outdoors | 0.07 | Nothing | 0.06 | Nothing | | 0.06 | | Structure/boundaries/intentionality | | 0.06 | |

**Table 3 (Continued).** Responses to Freelist Interview Questions by Nationality, Age, Gender, Race, and Academic Level (Question 6)

| **Nationality** | | | | **Sex** | | | | **Race** | | | | **Academic Level** | | | | | | |
| --- | --- | --- | --- | --- | --- | --- | --- | --- | --- | --- | --- | --- | --- | --- | --- | --- | --- | --- |
| **US** | | **International** | | **Male** | | **Female** | | **White** | | **Non-White** | | **Graduate** | | | **Undergraduate** | | | |
| **Response** | **SSI** | **Response** | **SSI** | **Response** | **SSI** | **Response** | **SSI** | **Response** | **SSI** | **Response** | **SSI** | **Response** | **SSI** | | **Response** | | **SSI** | |
| **Question 6: Please list all the things you think the university can do to support student health in these times.** | | | | | | | | | | | | | | | | | | |
| Mental health/Health resources | 0.25 | Didactic improvement | 0.14 | Mental health/Health resources | 0.19 | Mental health/Health resources | 0.23 | Mental health/Health resources | 0.21 | Mental health/Health resources | 0.22 | Mental-health/health resources | | 0.20 | | Mental health/Health resources | | 0.23 |
| Transparent communication | 0.14 | Include in conversations | 0.13 | Food accessibility | 0.14 | Transparent communication | 0.15 | Transparent communication | 0.14 | Transparent communication | 0.12 | Transparent communication | | 0.09 | | Transparent communication | | 0.18 |
| Food accessibility | 0.11 | Safeguards | 0.11 | Include in conversations | 0.12 | Financial support | 0.07 | Gym access | 0.10 | Include in conversations | 0.11 | Food accessibility | | 0.08 | | Include in conversations | | 0.14 |
| Include in conversations | 0.08 | Financial support | 0.11 | Promote resources | 0.09 | Include in conversations | 0.07 | Promote resources | 0.09 | Food accessibility | 0.10 | Gym access | | 0.08 | | Food accessibility | | 0.11 |
| Promote resources | 0.06 | Transparent communication | 0.08 | Transparent communication | 0.08 | Food accessibility | 0.06 | Nothing | 0.08 | Didactic improvement | 0.07 | Didactic improvement | | 0.07 | | Promote resources | | 0.07 |
| Note: Blue highlights are items that different in between group analyses and purple highlights are items that were unique across all groups. | | | | | | | | | | | | | | | | | | |
